# Supplementary material for: Arbuscular Mycorrhizal Fungi Isolated from Highly Saline “Sabkha Habitat” Soil Alleviated the NaCl-Induced Stress and Improved Lasiurus scindicus Henr. Growth
Source: MDPI journal article supplement (doi:10.3390/agriculture12030337), 2022-02-27
Supplement: s1 [file s1]

**Table S1:- Showing Analysis of variance (ANOVA ) on the effects of arbuscular mycorrhizal fungi (AMF) from Sabkha and no-Sabkha habitat on the growth parameters of *L. scindicus* plants grown under different levels of salinity(S).**

| Source of Variance  | df | fValue | pValue  | LSD   | cv     | Source of Variance | df | fValue | pValue  | LSD   | cv    | Source of Variance | df | f value | p value | LSD   | cv    |
|---------------------|----|--------|---------|-------|--------|--------------------|----|--------|---------|-------|-------|--------------------|----|---------|---------|-------|-------|
| Shoot Height        |    |        |         |       |        | Shoot fresh weight |    |        |         |       |       | Shoot dry weight   |    |         |         |       |       |
| Salinity            | 2  | 113.69 | <0.0001 | 4.490 | 14.708 | Salinity           | 2  | 146.27 | <0.0001 | 0.123 | 17.55 | Salinity           | 2  | 129.81  | <.0001  | 0.081 | 19.75 |
| AMF                 | 2  | 1.37   | <0.2797 |       |        | AMF                | 2  | 3.56   | <0.0497 |       |       | AMF                | 2  | 2.22    | <0.1374 |       |       |
| Salinity x AMF      | 4  | 0.48   | <0.7514 |       |        | Salinity x AMF     | 4  | 0.58   | <0.6825 |       |       | Salinity x AMF     | 4  | 0.28    | <0.8869 |       |       |
| Total Root Length   |    |        |         |       |        | Root Fresh Weight  |    |        |         |       |       | Root Dry Weight    |    |         |         |       |       |
| Salinity            | 2  | 446.94 | <0.0001 | 6.778 | 8.115  | Salinity           | 2  | 161.99 | <0.0001 | 0.106 | 15.15 | Salinity           | 2  | 210.59  | <0.0001 | 0.06  | 14.5  |
| AMF                 | 2  | 7.86   | 0.0035  |       |        | AMF                | 2  | 2.61   | 0.1009  |       |       | AMF                | 2  | 7.63    | 0.004   |       |       |
| Salinity x AMF      | 4  | 5.03   | 0.0067  |       |        | Salinity x AMF     | 4  | 2.03   | 0.133   |       |       | Salinity x AMF     | 4  | 3.18    | 0.0383  |       |       |
| Root Surface Area   |    |        |         |       |        | Root Volume        |    |        |         |       |       | Root Diameter      |    |         |         |       |       |
| Salinity            | 2  | 173.6  | <0.0001 | 6.047 | 16.09  | Salinity           | 2  | 195.18 | <0.0001 | 0.324 | 19.89 | Salinity           | 2  | 66.39   | <0.0001 | 0.136 | 12.63 |
| AMF                 | 2  | 0.94   | 0.4086  |       |        | AMF                | 2  | 1.96   | 0.1693  |       |       | AMF                | 2  | 10.65   | 0.0009  |       |       |
| Salinity x AMF      | 4  | 0.36   | 0.8352  |       |        | Salinity x AMF     | 4  | 1.52   | 0.2378  |       |       | Salinity x AMF     | 4  | 3.21    | 0.0374  |       |       |
| Number of Root Tips |    |        |         |       |        | Chlorophyll a      |    |        |         |       |       | Chlorophyll b      |    |         |         |       |       |
| Salinity            | 2  | 417.61 | <0.0001 | 8.356 | 9.149  | Salinity           | 2  | 240.28 | <.0001  | 0.116 | 11.56 | Salinity           | 2  | 74.84   | <.0001  | 0.155 | 16.5  |
| AMF                 | 2  | 0.56   | 0.5789  |       |        | AMF                | 2  | 9.33   | 0.0017  |       |       | AMF                | 2  | 4.6     | 0.0243  |       |       |
| Salinity x AMF      | 4  | 0.55   | 0.7024  |       |        | Salinity x AMF     | 4  | 1.8    | 0.1725  |       |       | Salinity x AMF     | 4  | 0.57    | 0.6886  |       |       |
| Total chlorophyll   |    |        |         |       |        | Carotenoids        |    |        |         |       |       | Proline            |    |         |         |       |       |
| Salinity            | 2  | 83.85  | <.0001  | 0.139 | 15.79  | Salinity           | 2  | 108.06 | <.0001  | 0.061 | 17.74 | Salinity           | 2  | 153.9   | <.0001  | 0.868 | 21.42 |
| AMF                 | 2  | 4.77   | 0.0218  |       |        | AMF                | 2  | 3.82   | 0.0413  |       |       | Status             | 2  | 11.19   | 0.0007  |       |       |
| Salinity x AMF      | 4  | 0.52   | 0.7255  |       |        | Salinity x AMF     | 4  | 1.33   | 0.2985  |       |       | Salinity x AMF     | 4  | 3.94    | 0.0181  |       |       |

|                            |   |        |        |       |       |                                        |   |        |        |       |       |                            |   |        |        |       |       |
|----------------------------|---|--------|--------|-------|-------|----------------------------------------|---|--------|--------|-------|-------|----------------------------|---|--------|--------|-------|-------|
| Phenol                     |   |        |        |       |       | Hydrogen Peroxide                      |   |        |        |       |       | Protein                    |   |        |        |       |       |
| Salinity                   | 2 | 46.56  | <.0001 | 8.128 | 13.9  | Salinity                               | 2 | 177.37 | <.0001 | 0.301 | 12.58 | Salinity                   | 2 | 70.63  | <.0001 | 1.094 | 17.48 |
| AMF                        | 2 | 9.58   | 0.0015 |       |       | AMF                                    | 2 | 42.32  | <.0001 |       |       | AMF                        | 2 | 6.87   | 0.0061 |       |       |
| Salinity<br>x AMF          | 4 | 5.79   | 0.0036 |       |       | Salinity x AMF                         | 4 | 8.63   | 0.0005 |       |       | Salinity x AMF             | 4 | 0.71   | 0.596  |       |       |
| Superoxide dismutase (SOD) |   |        |        |       |       | catalase (CAT)                         |   |        |        |       |       | Ascorbate peroxidase (APX) |   |        |        |       |       |
| Salinity                   | 2 | 91.73  | <.0001 | 0.532 | 12.29 | Salinity                               | 2 | 143.87 | <.0001 | 0.815 | 10.19 | Salinity                   | 2 | 52.71  | <.0001 | 0.209 | 14.79 |
| AMF                        | 2 | 16.13  | <.0001 |       |       | AMF                                    | 2 | 15.12  | 0.0001 |       |       | AMF                        | 2 | 4.82   | 0.0211 |       |       |
| Salinity<br>x AMF          | 4 | 2.92   | 0.0505 |       |       | Salinity x AMF                         | 4 | 3.62   | 0.0246 |       |       | Salinity x AMF             | 4 | 1.72   | 0.1892 |       |       |
| Glutathione reductase (GR) |   |        |        |       |       | Monodehydroascorbate reductase (MDHAR) |   |        |        |       |       | AMF Mycelium               |   |        |        |       |       |
| Salinity                   | 2 | 113.77 | <.0001 | 0.217 | 19.12 | Salinity                               | 2 | 218.27 | <.0001 | 0.239 | 15.08 | Salinity                   | 2 | 176.37 | <.0001 | 5.082 | 13.15 |
| AMF                        | 2 | 19.42  | <.0001 |       |       | AMF                                    | 2 | 24.67  | <.0001 |       |       | AMF                        | 2 | 402.2  | <.0001 |       |       |
| Salinity<br>x AMF          | 4 | 12.07  | <.0001 |       |       | Salinity x AMF                         | 4 | 22.01  | <.0001 |       |       | Salinity X AMF             | 4 | 46.11  | <.0001 |       |       |
| AMF Vesicles               |   |        |        |       |       | AMF Arbuscules                         |   |        |        |       |       | AMF Spores                 |   |        |        |       |       |
| Salinity                   | 2 | 147.38 | <.0001 | 4.755 | 17.06 | Salinity                               | 2 | 162.51 | <.0001 | 5.538 | 15.41 | Salinity                   | 2 | 230.93 | <.0001 | 15.29 | 12.71 |
| AMF                        | 2 | 245.72 | <.0001 |       |       | AMF                                    | 2 | 301.82 | <.0001 |       |       | AMF                        | 2 | 418.33 | <.0001 |       |       |
| Salinity<br>x AMF          | 4 | 53.77  | <.0001 |       |       | Salinity x AMF                         | 4 | 44.3   | <.0001 |       |       | Salinity x AMF             | 4 | 60.64  | <.0001 |       |       |
